# Supplementary material for: A β-FeOOH/MXene sandwich for high-performance anodes in lithium-ion batteries
Source: Royal Society of Chemistry journal article supplement (doi:10.1039/d0dt01531h), 2020-01-01
Supplement: d0dt01531h1.pdf [file d0dt01531h1.pdf]

## Supplementary Information

### A $\beta$ -FeOOH/MXene Sandwich for High-Performance Anodes in Lithium-ion Batteries

Lu He<sup>[a]†</sup>, Chuan Tan<sup>[a]†</sup>, Chuanchao Sheng<sup>[b]</sup>, Yuanzhao Chen<sup>[a]</sup>, Fengjiao Yu<sup>[b]\*</sup> and Yuhui Chen<sup>[a]\*</sup>

[a] State Key Laboratory of Materials-Oriented Chemical Engineering, School of Energy, Nanjing Tech University, Nanjing, Jiangsu, 211816 China

[b] State Key Laboratory of Materials-Oriented Chemical Engineering, College of Chemical Engineering, Nanjing Tech University, Nanjing, Jiangsu, 211816 China

Email: fjyu@njtech.edu.cn, chen@njtech.edu.cn,  
†L.H and C.T. contributed equally to this work.

#### Results of thermogravimetric analysis

Thermogravimetric analysis (TGA) was performed in nitrogen at a heating rate of 10 °C/min from 25 °C to 900 °C. The weight loss is due to the decomposition of FeOOH. According to the TGA results in Figure 1b, 22.8 % and 19.7 % of weight were respectively lost for FeOOH and FeOOH-Ti<sub>3</sub>C<sub>2</sub> composite. The content of FeOOH is responsible for all the weight loss of FeOOH-Ti<sub>3</sub>C<sub>2</sub> composite, as Ti<sub>3</sub>C<sub>2</sub> results in no weight loss during TG process. Therefore, the ratio of FeOOH in the composite is calculated as 19.7 / 22.8 = 87 %.

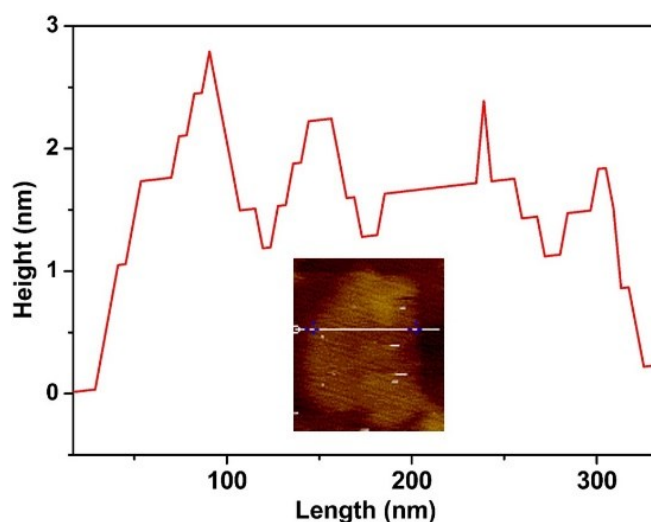

Figure S1 AFM results of a typical Ti<sub>3</sub>C<sub>2</sub> flake. Sectional profile of the Ti<sub>3</sub>C<sub>2</sub>. Inset: Topographic image of the Ti<sub>3</sub>C<sub>2</sub>.

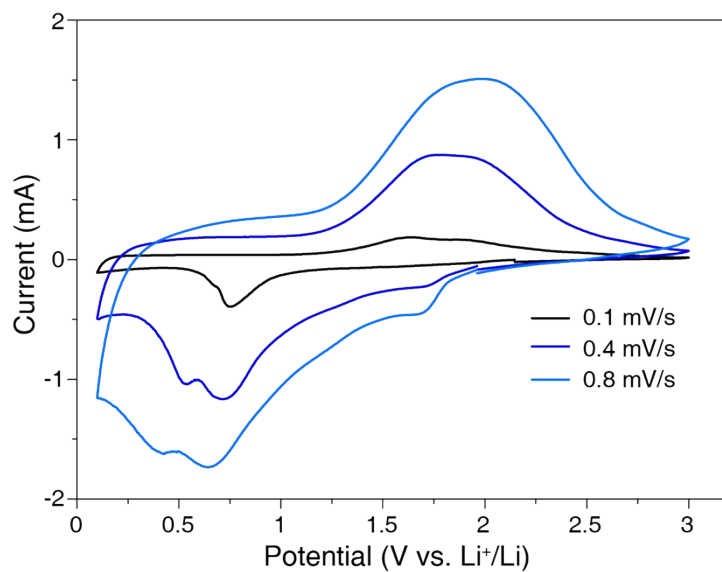

**Figure S2** CV curves for the FeOOH/Ti<sub>3</sub>C<sub>2</sub> composite at various scan rates.

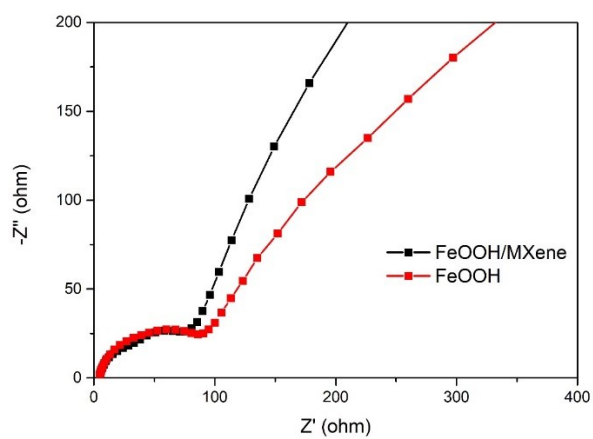

**Figure S3** EIS results of the FeOOH/MXene and FeOOH.
